# Supplementary material for: Isogenic Mammary Models of Intraductal Carcinoma Reveal Progression to Invasiveness in the Absence of a Non-Obligatory In Situ Stage
Source: MDPI journal article supplement (doi:10.3390/cancers15082257), 2023-04-12
Supplement: s1 [file s1]

C57BL/6

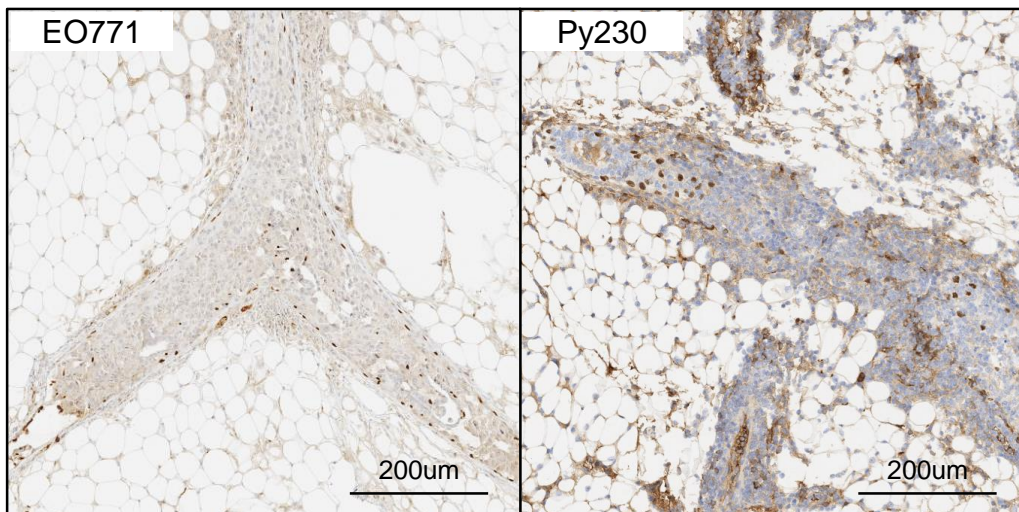

BALB/c

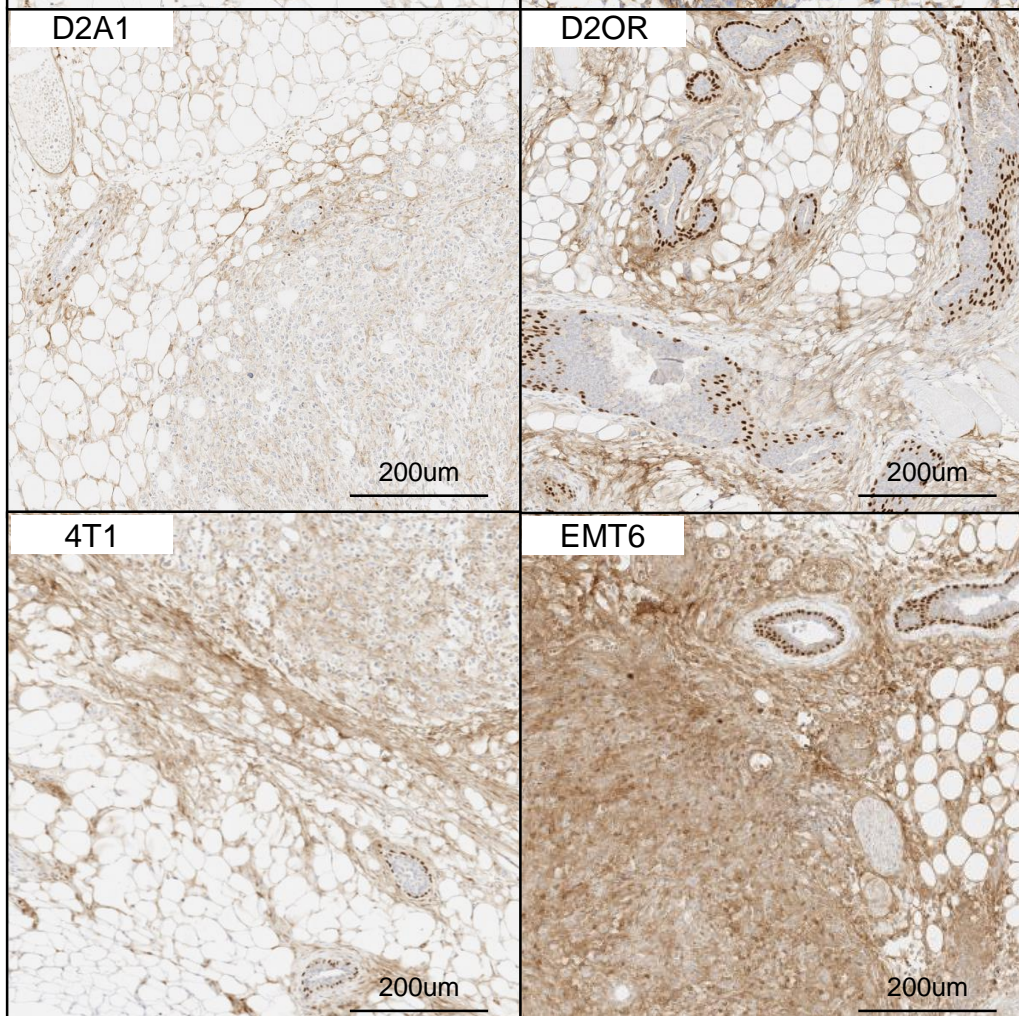

**Supplementary Figure S1: p63 staining in intraductal tumors collected from C57BL/6 (EO771, Py230) and BALB/c (D2A1, D2OR, 4T1, EMT6) mice.**

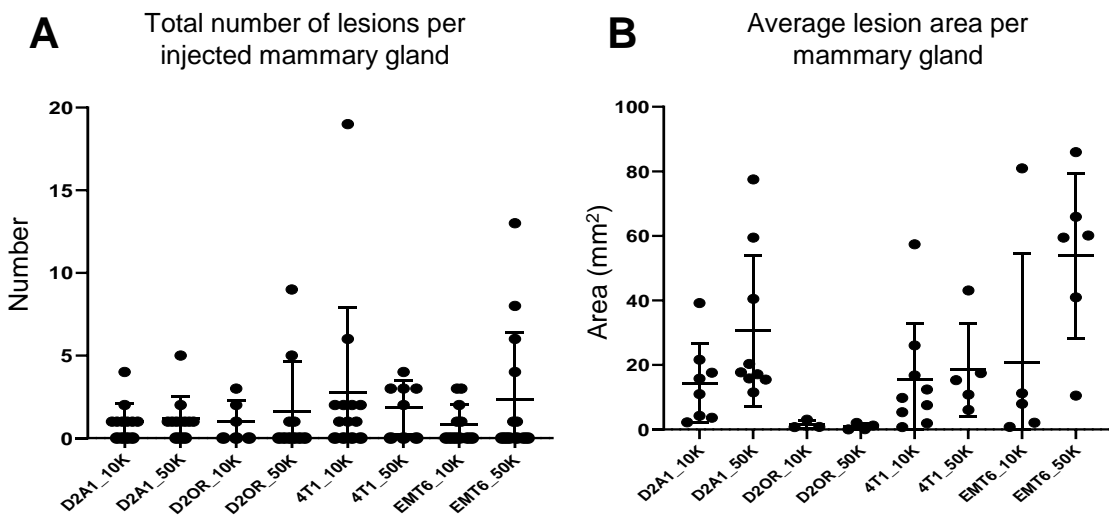

**Supplementary Figure S2: The total number and average area of lesions that developed following intraductal injection of mammary cell lines into BALB/c immune-competent hosts.** Murine mammary cell lines D2A1, D2.OR, 4T1, and EMT6 were intraductally injected into the 4<sup>th</sup> mammary glands of BALB/c mice at either or  $1 \times 10^4$  (10K) or  $5 \times 10^4$  (50K) cells in 2 $\mu$ L. Mammary glands were collected when the first tumor became palpable. (A) The average number of lesions per mammary gland. (B) The average area of lesions. Results presented as mean $\pm$ stdev. Dots represent individual mice. Differences in tumor number and area were assessed using Student's T-test. No data were statistically significant.

H&E

Calponin

aSMA

p63

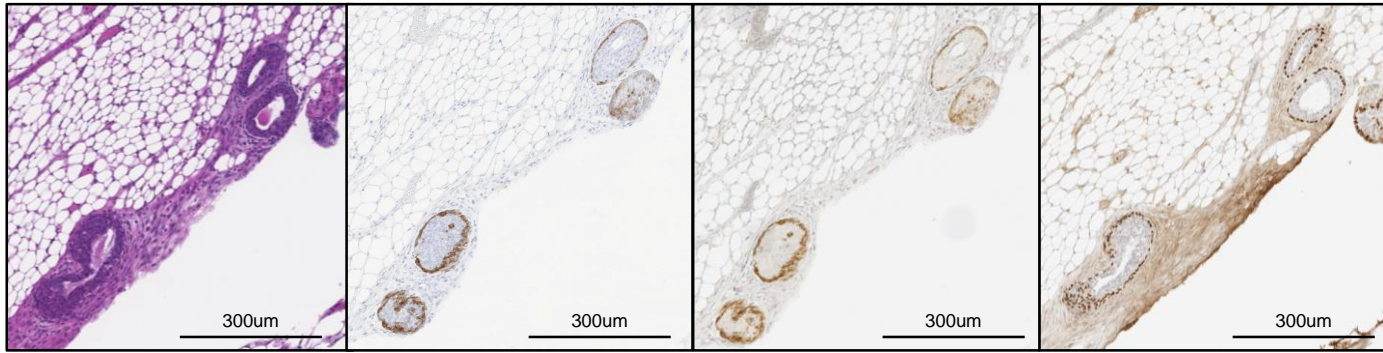

**Supplementary Figure S3: Examples of DCIS collected from BALB/c (4T1) mice.**

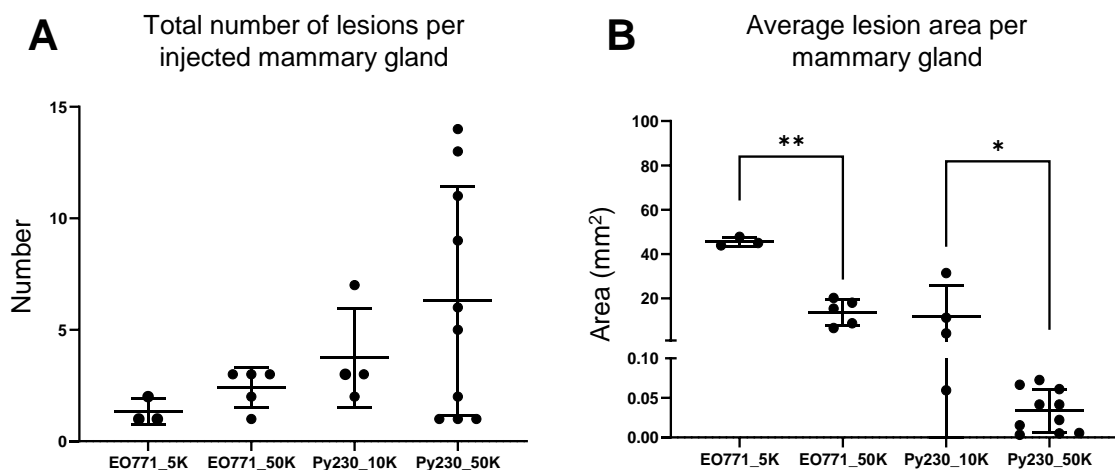

**Supplementary Figure S4: The total number and average area of lesions that developed following intraductal injection of mammary cell lines into C57BL/6 immune-competent hosts.** Murine mammary cancer cell lines EO771 and Py230 were intraductally injected into the 4<sup>th</sup> mammary glands of C57BL/6 mice at various concentrations: EO771 ( $5 \times 10^3$  (5K) or  $5 \times 10^4$  (50K) cells in  $2 \mu\text{L}$ ) or Py230 ( $1 \times 10^4$  (10K) or  $5 \times 10^4$  (50K) cells in  $2 \mu\text{L}$ ). Mammary glands were collected either 35 days (EO771) or 14 days (Py230) post-injection and assessed for tumors. (A) The average number of lesions per mammary gland. (B) The average area of lesions. Results presented as mean $\pm$ stdev. Dots represent individual mice. Differences in tumor number and area were assessed using Student's T-test. \*\* $p < 0.005$ ; \* $p < 0.05$

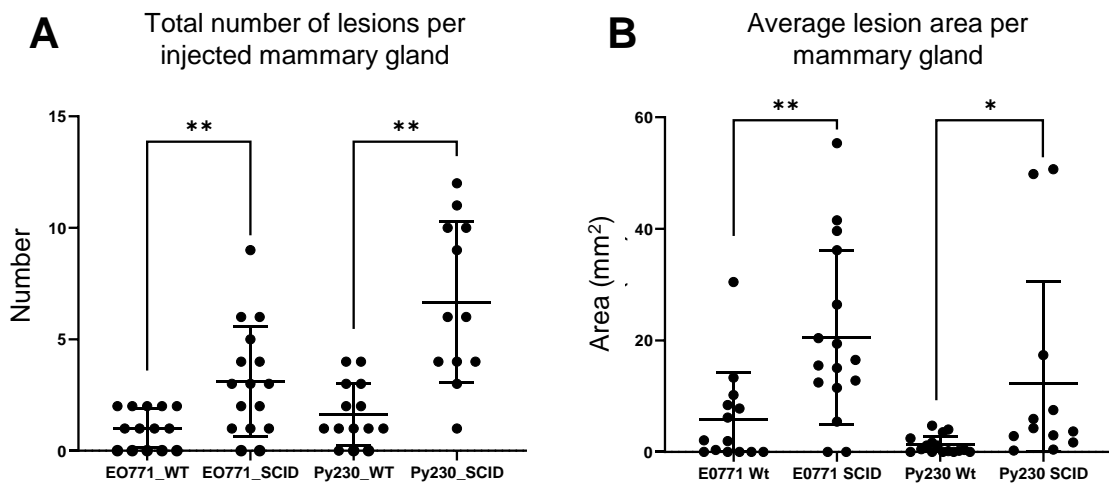

**Supplementary Figure S5: The total number and average area of lesions that developed following intraductal injection of mammary cell lines into C57BL/6/SCID immunocompromised hosts.** Murine mammary cell lines EO771 ( $5 \times 10^4$  cells in  $2 \mu\text{L}$ ) or Py230 ( $5 \times 10^4$  cells in  $2 \mu\text{L}$ ) were intraductally injected into the 4<sup>th</sup> right mammary glands of C57BL/6/SCID (SCID) mice or wild-type C57BL/6 (WT) mice. Mammary glands were collected 26 days (EO771) or 11 days (Py230) later and assessed for tumors. (A) The average number of lesions per mammary gland. (B) The average area of lesions. Results presented as mean  $\pm$  stdev. Dots represent individual mice. Differences in tumor number and area were assessed using Student's T-test. \*\*p < 0.005; \*p < 0.05

| Cell line | Strain  | Intrinsic Subtype            | Ref.                            |
|-----------|---------|------------------------------|---------------------------------|
| D2A1      | BALB/c  | Luminal B                    | (Yang <i>et. al.</i> , 2017)    |
| D2OR      | BALB/c  | Basal-like                   | (Prunier <i>et. al.</i> , 2021) |
| 4T1       | BALB/c  | Luminal A                    | (Yang <i>et. al.</i> , 2017)    |
| EMT6      | BALB/c  | Luminal A                    | (Yang <i>et. al.</i> , 2017)    |
| EO771     | C57BL/6 | Luminal B                    | (Yang <i>et. al.</i> , 2017)    |
| Py230     | C57BL/6 | Luminal A, Her2+, Basal-like | (Bao <i>et al.</i> , 2015)      |

**Supplementary Table S1: Intrinsic subtypes of the murine mammary cancer cell lines used in the study.**

|         |           | MAMMARY GLAND |                              |                             |                                    | LESIONS              |                    |                   |                                        | Days to euthanasia |
|---------|-----------|---------------|------------------------------|-----------------------------|------------------------------------|----------------------|--------------------|-------------------|----------------------------------------|--------------------|
|         | Cell line | MG injected   | Injections resulting in DCIS | Injections resulting in IDC | Injections resulting in no lesions | Total lesions across | Total DCIS lesions | Total IDC lesions | Average lesion size (mm <sup>2</sup> ) |                    |
| C57BL/6 | EO771 5K  | 12            | 0/12 (0)                     | 3/12 (25)                   | 9/12 (75)                          | 4                    | 0/4 (0)            | 4/4 (100)         | 45.58                                  | 35                 |
|         | EO771 50K | 14            | 0/14 (0)                     | 5/14 (36)                   | 9/14 (64)                          | 12                   | 0/12 (0)           | 12/12 (100)       | 17.78                                  | 35                 |
|         | Py230 10K | 5             | 0/5 (0)                      | 4/5 (80)                    | 1/5 (20)                           | 15                   | 0/15 (0)           | 15/15 (100)       | 11.74                                  | 14                 |
|         | Py230 50K | 11            | 1/11 <sup>†</sup> (9)        | 10/11 (91)                  | 1/11 (9)                           | 63                   | 6/63 (10)          | 57/63 (90)        | 0.322                                  | 14                 |
| BALB/c  | D2A1 10K  | 12            | 0/12 (0)                     | 8/12 (67)                   | 4/12 (33)                          | 12                   | 0/12 (0)           | 12/12 (100)       | 14.40                                  | 33                 |
|         | D2A1 50K  | 12            | 0/12 (0)                     | 9/12 (75)                   | 3/12 (25)                          | 14                   | 0/14 (0)           | 14/14 (100)       | 30.59                                  | 33                 |
|         | D2OR 10K  | 6             | 0/6 (0)                      | 3/6 (50)                    | 3/6 (50)                           | 6                    | 0/6 (0)            | 6/6 (100)         | 1.55                                   | 15                 |
|         | D2OR 50K  | 10            | 0/10 (0)                     | 4/10 (40)                   | 6/10 (60)                          | 16                   | 0/16 (0)           | 16/16 (100)       | 0.86                                   | 15                 |
|         | 4T1 10K   | 10            | 1/10 <sup>†</sup> (10)       | 9/10 (90)                   | 1/10 (10)                          | 36                   | 3/36 (8)           | 33/36 (92)        | 15.32                                  | 11                 |
|         | 4T1 50K   | 5             | 0/5 (0)                      | 5/5 (100)                   | 0/5 (0)                            | 15                   | 0/15 (0)           | 15/15 (100)       | 18.54                                  | 11                 |
|         | EMT6 10K  | 11            | 1/11 <sup>†</sup> (9)        | 5/11 (45)                   | 6/11 (55)                          | 10                   | 1/10 (10)          | 9/10 (90)         | 20.58                                  | 14                 |
|         | EMT6 50K  | 8             | 0/8 (0)                      | 6/8 (75)                    | 2/8 (25)                           | 33                   | 0/33 (0)           | 33/33 (100)       | 53.81                                  | 14                 |

**Supplementary Table S2: Summary of the number of ductal carcinoma *in situ* and invasive ductal carcinoma lesions that developed following intraductal injection of mammary carcinoma cell lines into immune-competent mice.** Murine mammary cancer cell lines were intraductally injected into the 4<sup>th</sup> mammary glands of either C57BL/6 (cell lines EO771, Py230) or BALB/c (cell lines D2A1, D2OR, 4T1, EMT6) mice. Cells were delivered in a total volume of 2μL per mammary gland. Various cell concentrations were investigated, including 5×10<sup>3</sup> cells (5K), 1×10<sup>4</sup> cells (10K), or 5×10<sup>4</sup> cells (50K). Intraductal injections that resulted in both DCIS and IDC lesions in the same mammary gland are identified by †. Abbreviations MG = mammary gland; IDC = invasive ductal carcinoma; DCIS = ductal carcinoma *in situ*.

|         |            | MAMMARY GLAND |                              |                             |                                    | LESIONS              |                    |                   |                                        | Days to euthanasia |
|---------|------------|---------------|------------------------------|-----------------------------|------------------------------------|----------------------|--------------------|-------------------|----------------------------------------|--------------------|
|         | Cell line  | MG injected   | Injections resulting in DCIS | Injections resulting in IDC | Injections resulting in no lesions | Total lesions across | Total DCIS lesions | Total IDC lesions | Average lesion size (mm <sup>2</sup> ) |                    |
| C57BL/6 | EO771 WT   | 14            | 0/14 (0)                     | 9/14 (64)                   | 5/14 (36)                          | 9                    | 0/9 (0)            | 9/9 (100)         | 5.77                                   | 26                 |
|         | EO771 SCID | 16            | 0/16 (0)                     | 14/16 (88)                  | 2/16 (12)                          | 64                   | 0/64 (0)           | 64/64 (100)       | 20.51                                  | 26                 |
|         | Py230 WT   | 14            | 1/14 <sup>†</sup> (7)        | 11/14 (79)                  | 3/14 (21)                          | 23                   | 3/23 (13)          | 20/23 (87)        | 1.25                                   | 11                 |
|         | Py230 SCID | 12            | 0/12 (0)                     | 12/12 (100)                 | 0/12 (0)                           | 80                   | 0/80 (0)           | 80/80 (100)       | 12.29                                  | 11                 |

**Supplementary Table S3: Summary of the number of ductal carcinoma *in situ* and invasive ductal carcinoma lesions following intraductal injection of mammary carcinoma cell lines into immunocompromised mice.** Murine mammary cell lines EO771 (5×10<sup>4</sup> cells in 2μL) or Py230 (5×10<sup>4</sup> cells in 2μL) were intraductally injected into the 4<sup>th</sup> right mammary glands of C57BL/6/SCID (SCID) mice or wild-type C57BL/6 (WT) mice. Mammary glands were collected 26 days (EO771) or 11 days (Py230) later and assessed for tumors. Intraductal injections that resulted in both DCIS and IDC lesions in the same mammary gland are identified by †. Abbreviations MG = mammary gland; IDC = invasive ductal carcinoma; DCIS = Ductal Carcinoma *in situ*.
